# Supplementary material for: Cultivating Rural Surgical Leaders: Insights from a Qualitative Case Study
Source: Research Square preprint supplement (doi:10.21203/rs.3.rs-6583649/v1), 2025-07-02
Supplement: Supplementary file 1 [file 272afc8151e2c3b86a533b84.docx]

**Questions for Employers who have worked with RSLP trained Doctors:**

1. Can you give an introduction of yourself and your role at [Name of Rural Hospital]?

a. What are your responsibilities?
b. Years of experience
c. Educational/training background

1. What are some of the common surgical needs or challenges faced by this community?
   a. How would you describe the patient population served by your hospital?
   i. Age of population
   ii. Gender of population
   iii. Socioeconomic status
   iv. Presenting complaint
2. What are the challenges/barriers your hospital faces in terms of surgical care provision?
   a. What strategies have been used to address those challenges?
3. Were you present during their training period?
4. Can you describe your experience working with RSLP graduates?
5. How have the RSLP graduates contributed or made an impact in providing surgical care?
   a. Service delivery
   b. Patient management
   c. Administrative processes
   d. Team dynamics
6. How would you assess the surgical skills and knowledge of [name of graduate]?
   a. Diagnosis
   b. Perioperative management
   c. Intraoperative management
7. Do you think there are particular training or development opportunities in the program that would have helped them in their roles?
   a. What additional skills can we add to the program?
8. Do they incorporate this feedback for future performance?
9. Is there any collaboration between [name of graduate] and other healthcare professionals at your hospital? If so, to what extent is this collaboration observed?
10. Can you share an instance where effective teamwork between [name of graduate] and other staff members led to improved patient outcomes or service delivery?
11. Have you participated in any interdisciplinary teams or projects led by RSLP-trained surgeons?
12. How do they handle conflicts or disagreements within a team?
13. How effectively have they integrated into existing dynamics?
14. Have they initiated any projects or collaborations with local institutions or programs?
    a. If yes, what are the projects aimed at?
    b. Preventative care?
    c. Chronic disease management?
    d. Maternal health?
15. Has [name of graduate] been involved in any capacity-building or training activities for staff members at your hospital?
    a. Experiences of mentorship, skill transfer, and professional development initiatives led by [name of graduate].
    b. Training sessions on surgical techniques, patient safety protocols, and quality improvement methods.
16. How do you perceive the role of [name of graduate] in mentoring and supporting other healthcare professionals at your facility?
    a. How have they contributed to capacity building?
    b. Transfer of clinical skills, decision-making abilities, and professional values through mentorship.
