# Supplementary material for: Cultivating Rural Surgical Leaders: Insights from a Qualitative Case Study
Source: Research Square preprint supplement (doi:10.21203/rs.3.rs-6583649/v1), 2025-07-02
Supplement: Supplementary file 2 [file c6c5cc3f99c84d4e77753467.docx]

**Questions for RSLP Graduates**

1. What was your motivation to join the Rural Surgical Leadership program?
2. What were your expectations of the RSLP?
   1. Expectations in terms of learning outcomes
   2. Value of the program
3. How successful do you think the program has been, in achieving its objectives?
   1. in terms of its impact on the served population
   2. Your personal professional growth
4. How have you been serving the community after completing the program?
   1. Where is your current place of practice
   2. How long have you been practicing
   3. What are the roles and responsibilities of a person in your position?
5. Can you describe the patient population you serve
   1. What are common surgical needs of the community
   2. What are these disparities in surgical care?
6. In your opinion, what role do healthcare professionals play in addressing surgical disparities and improving outcomes in rural areas?
   1. What role do you think you're playing
   2. How do you think you’re making an impact?
7. What were the challenges you encountered while developing your skills in the program?
   1. Financial challenges
   2. Logistic challenges
   3. Cultural challenges
   4. How were they overcome
   5. What suggestions do you have to improve the program?
8. What skills has this program equipped you with in achieving your goals?
   1. Were there any significant outcomes or achievements
9. How do you plan to use your program experience to enhance surgical care access and quality in rural regions?
10. How has the program fostered your leadership abilities and collaborative skills
    1. In regard to partnering with communities, governments, and NGOs to enhance surgical care.
11. Have you influenced others to adopt new ideas or approaches based on your teachings from the program?
12. Have you mentored others based on what you learned in the program?
13. Can you share an experience where you effectively led a healthcare initiative or collaborated with stakeholders to improve surgical services in a rural setting?
14. Did the program emphasize community engagement and partnerships in surgical care?
    1. How have you used these ideas in your practice
15. How did the program equipped you with the knowledge required to deliver surgical care in rural settings, can you elaborate in terms of:
    1. Understanding of indications
    2. Procedural consideration
    3. Procedure preparation to ensure effective surgical interventions
    4. Infrastructure and manpower support that you require
16. Have you had the opportunity to apply particular skill sets learned from the program in your field of work?
17. If yes, how
18. If not, what issues are you facing in doing so
19. Can you compare how confident you are now in your ability to lead procedures after completing the program?
20. Procedures learnt from outside the domain of general surgery such as: orthopedics, pediatric surgery, OBGYN, anesthesia, urology and neurosurgery
21. Were there unique challenges when approaching a resource constrained environment during the fellowship?
22. Can you discuss any instances from your current employment where you directly applied knowledge or skills gained from the program to improve surgical care?
    1. Knowledge gained from leadership courses
    2. Knowledge gained from working in low resource settings
23. In your opinion, were there ample opportunities and experiences provided by the program for training you for a rural surgical practice?
24. Keeping your current practice in mind, do you think an adequate amount of time and exposure was allotted to each surgical subspecialty?
    1. If ‘No’, what specialty do you think requires more time and exposure.
25. How did the management courses improve your skills to effectively plan projects and manage healthcare delivery in your current practice?
    1. prioritizing tasks and allocating resources to achieve strategic objectives within your work environment?
    2. Identifying gaps in surgical care
    3. Planning service delivery
    4. Financial literacy
