# Supplementary material for: Cultivating Rural Surgical Leaders: Insights from a Qualitative Case Study
Source: Research Square preprint supplement (doi:10.21203/rs.3.rs-6583649/v1), 2025-07-02
Supplement: Supplementary file 3 [file ef8de5ac50011c03ca96665e.docx]

**Appendix 1**

**Table 1:** *Thematic Analysis of Interviews with RSLP Graduates and Supervisors*

| Theme | Subtheme | Key Findings |
| --- | --- | --- |
| Readiness and Accessibility of Healthcare Facilities in Rural Areas for Surgical Procedures | Access to Healthcare in Rural Areas | - In rural areas, the healthcare facilities are hours away with underdeveloped roads and communication infrastructures. - Rural areas lack basic surgical services such as appendectomies, cholecystectomies, hernia repairs, c-sections as there aren’t formally trained surgeons available. - Majority of the people in rural areas earn below minimum wage making healthcare unaffordable to them. - The rural healthcare centers lack essential diagnostic and surgical tools which limits effective care. |
| Availability of Human Resources in Healthcare Areas |
| Availability of Medical Equipment in Rural Areas |
| Comprehensive specialty-specific training in the RSLP program. | Surgical Skill Development During RSLP | - The RSLP trainees were exposed to multiple specialties such as orthopedic, pediatric, obstetrics, gynecology, anesthesia, radiology, and public health. - The RSLP Trainees feel more confident in providing diagnoses despite the lack of available diagnostic tools. - The trainees have developed a good understanding of how hospitals function including finances, management, and human resource management. - The trainees have gained efficient communication skills, and better coordination skills that help them provide efficient healthcare services. |
| The Coursework During RSLP |
| Soft Skill Development During RSLP |
| Leadership and Governance of RSLP Graduates | Adaptability Across Specialties | - The RSLP trainees employed at different rural areas are effectively providing surgical care related to trauma, gynecology, along with laparotomies and hernia repairs. - The RSLP trainees also organize community outreach programs to create awareness about different healthcare needs. - The RSLP trainees continuously mentor and train nurses and doctors on CPR, wound care, and pre- and post-op care. - The RSLP trainees have reduced the number of cases being referred to district healthcare centers for basic life-saving procedures. |
| Improving Patient Care |
| Capacity Building of Healthcare Workforce |
| Intersectoral Collaboration |
